# Supplementary material for: Multifunctional Pt(iv) prodrug candidates featuring the carboplatin core and deferoxamine
Source: Royal Society of Chemistry journal article supplement (doi:10.1039/d1dt00214g), 2021-01-01
Supplement: d1dt00214g1.pdf [file d1dt00214g1.pdf]

## Electronic Supplementary Information

### Multifunctional Pt(IV) prodrug candidates featuring the carboplatin core and deferoxamine

Sophia Harringer,<sup>a</sup> Michaela Hejl,<sup>a</sup> Éva A. Enyedy,<sup>b</sup> Michael A. Jakupec,<sup>a,c</sup>  
Markus Galanski,<sup>a</sup> Bernhard K. Keppler,<sup>a,c</sup> Paul J. Dyson<sup>d</sup> and Hristo P. Varbanov<sup>\*a,e</sup>

<sup>a</sup>. Institute of Inorganic Chemistry, Faculty of Chemistry, University of Vienna, Waehringer Strasse 42, 1090 Vienna, Austria

<sup>b</sup>. Department of Inorganic and Analytical Chemistry, Interdisciplinary Excellence Centre, and MTA-SZTE Lendület Functional Metal Complexes Research Group, University of Szeged, Dóm tér 7, H-6720 Szeged, Hungary

<sup>c</sup>. Research Cluster “Translational Cancer Therapy Research”, Waehringer Strasse 42, 1090 Vienna, Austria

<sup>d</sup>. Institut des Sciences et Ingénierie Chimiques, Ecole Polytechnique Fédérale de Lausanne (EPFL), CH-1015 Lausanne, Switzerland

<sup>e</sup>. Institute of Chemistry - Inorganic Chemistry, University of Graz, Schubertstraße 1/III, 8010 Graz, Austria

## Contents

|          |                                                                                                                   |
|----------|-------------------------------------------------------------------------------------------------------------------|
| Page S2  | HPLC purity of complex A                                                                                          |
| Page S2  | Lipophilicity and solubility data (Table S1)                                                                      |
| Page S3  | Stability of complex B in the presence of ascorbate: $^1\text{H}$ NMR spectra                                     |
| Page S4  | Interactions with $\text{Fe}^{3+}$ , $\text{Zn}^{2+}$ and $\text{Zr}^{4+}$ : UHPLC chromatograms                  |
| Page S6  | Interactions with $\text{Fe}^{3+}$ , $\text{Zn}^{2+}$ and $\text{Zr}^{4+}$ : ESI-HRMS spectra                     |
| Page S8  | UV-Vis spectrophotometry and electrochemical studies                                                              |
| Page S10 | Cytotoxicity studies: concentration-effect curves                                                                 |
| Page S13 | Table S2 with data from the combination studies between carboplatin and DFO in the investigated cancer cell lines |
| Page S14 | $^1\text{H}$ and $^{13}\text{C}$ NMR spectra                                                                      |

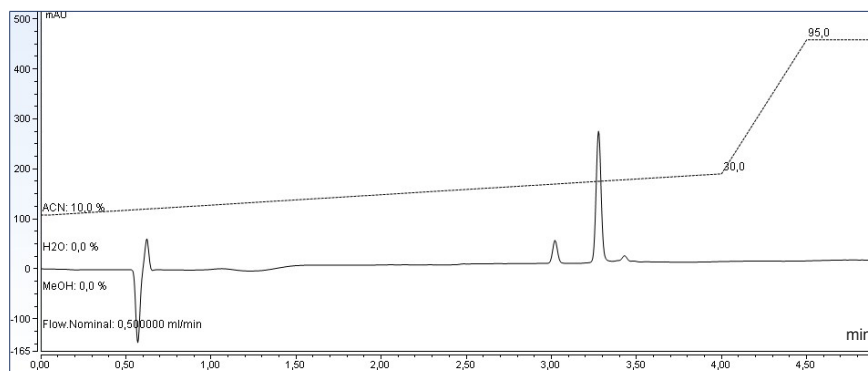

**Fig. S1** HPLC purity of complex **A**: product peak at 3.28 min (~85%) and main impurity peak at 3.02 min (~12%). A 10-30% linear gradient of MeCN in water (with 0.1% FA) over 4 min was used; UHPLC chromatogram recorded at 225 nm is shown.

**Table S1** Approximate water solubility and lipophilicity chromatographic parameters ( $\log k_w$  and  $\varphi_0$ ) for the new Pt(IV)-DFO conjugates, carboplatin and DFO mesylate.

| compound    | aq. solub. <sup>a</sup> | $\log k_w$ | $\varphi_0$ |
|-------------|-------------------------|------------|-------------|
| carboplatin | 9.2                     | -0.02      | -           |
| DFO.mes     | >50                     | 2.69       | 33.4        |
| <b>A</b>    | 0.7                     | 3.48       | 47.8        |
| <b>B</b>    | 2.2                     | 3.72       | 48.7        |
| <b>C</b>    | 0.8                     | 3.96       | 51.8        |
| <b>D</b>    | 1.1                     | 3.83       | 48.4        |
| <b>E</b>    | 0.1                     | 5.06       | 54.8        |

<sup>a</sup> approximate water solubility (given in mg/ml) was determined at room temperature by pipetting of minimal amounts of Milli-Q water to a weighted amount of substance until a clear solution is obtained (after shaking and sonication for 2-3 minutes)

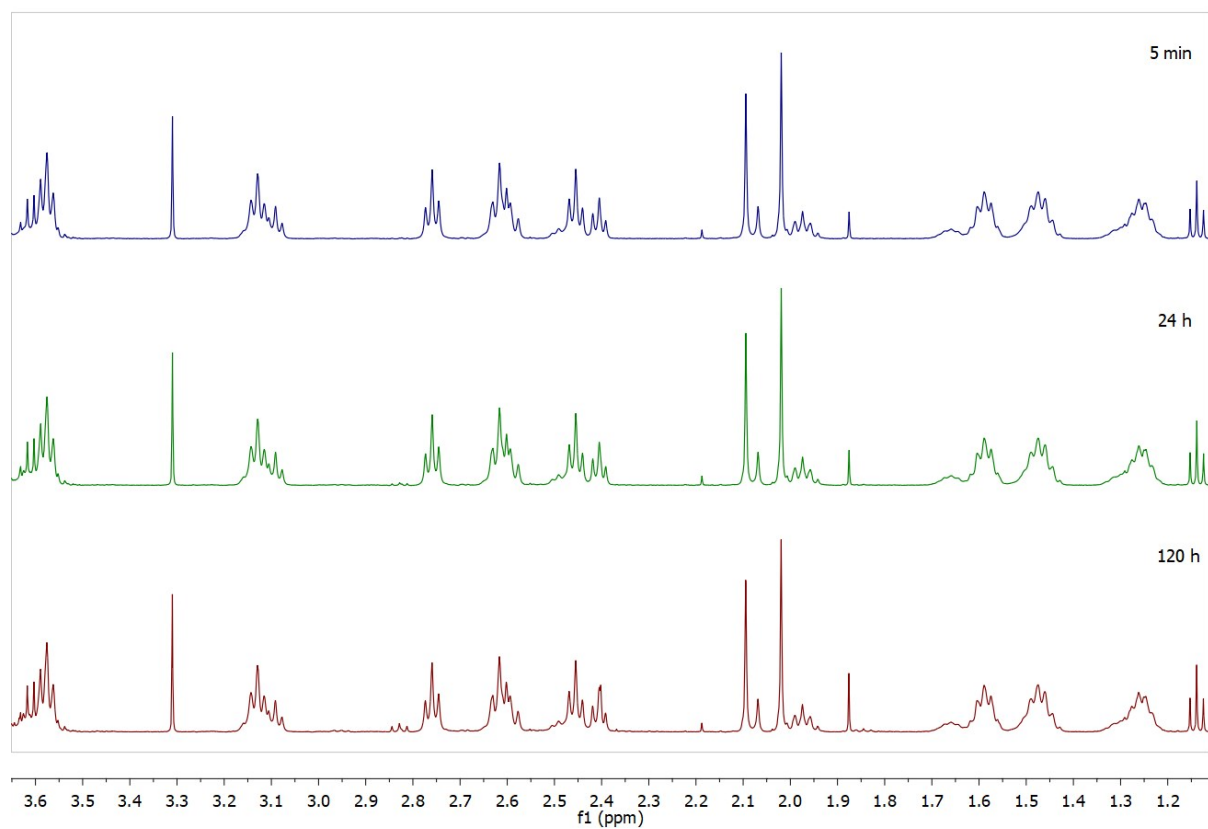

**Fig. S2** <sup>1</sup>H NMR spectra of complex **B** (1 mM) in 50 mM phosphate buffer (in D<sub>2</sub>O, pH 7.4) after addition of 25 mM ascorbic acid (top – after 5 min, middle – after 24 h, bottom after 120 h); measurements were carried out at ambient temperature.

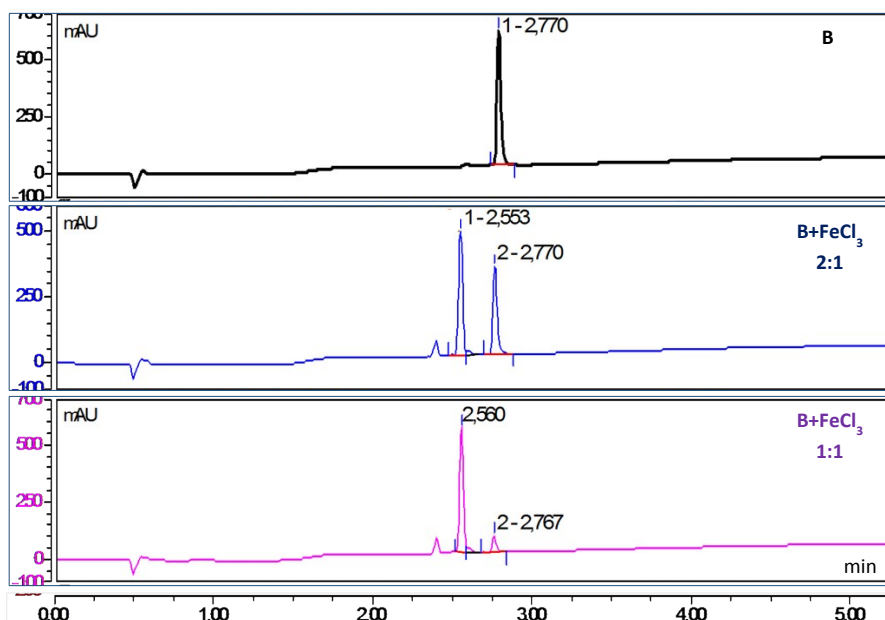

**Fig. S3** UHPLC chromatograms of aqueous solution of complex **B** alone or in a mixture with  $\text{FeCl}_3$  (0.5 or 1 equiv.) after 2 h of incubation at RT. A 5-85% linear gradient of MeCN in water (with 0.1% FA) was used; chromatograms recorded at 225 nm are shown.

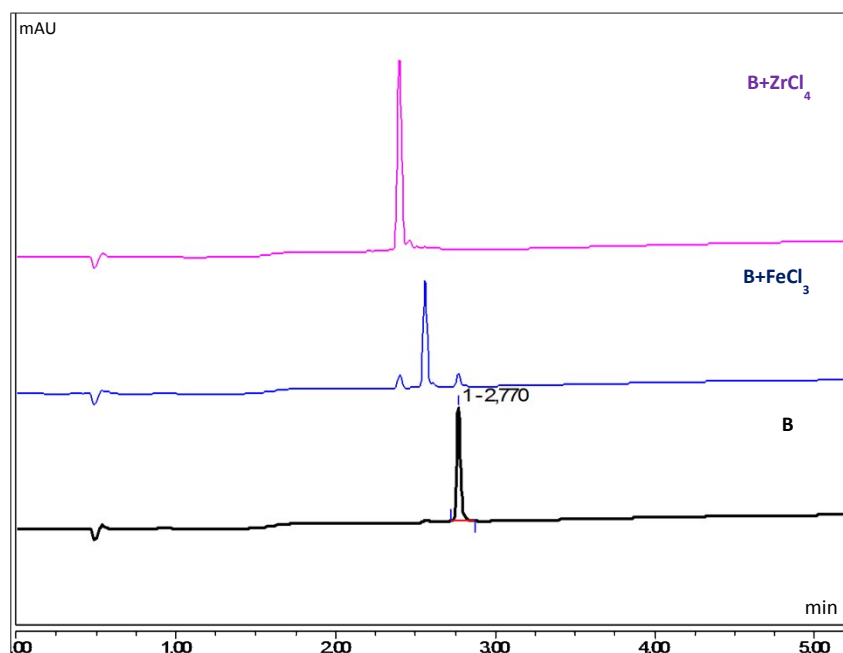

**Fig. S4** UHPLC chromatograms of complex **B** alone or in a mixture with  $\text{FeCl}_3$  or  $\text{ZrCl}_4$  (1 equiv.) after 2 h of incubation at RT. The new species formed ( $t_R = 2.40$  min for the Zr adduct and  $t_R = 2.56$  min for the Fe adduct) elute earlier than parent compound **B** ( $t_R = 2.77$  min). A 5-85% linear gradient of MeCN in water (with 0.1% FA) was used; chromatograms recorded at 225 nm are shown.

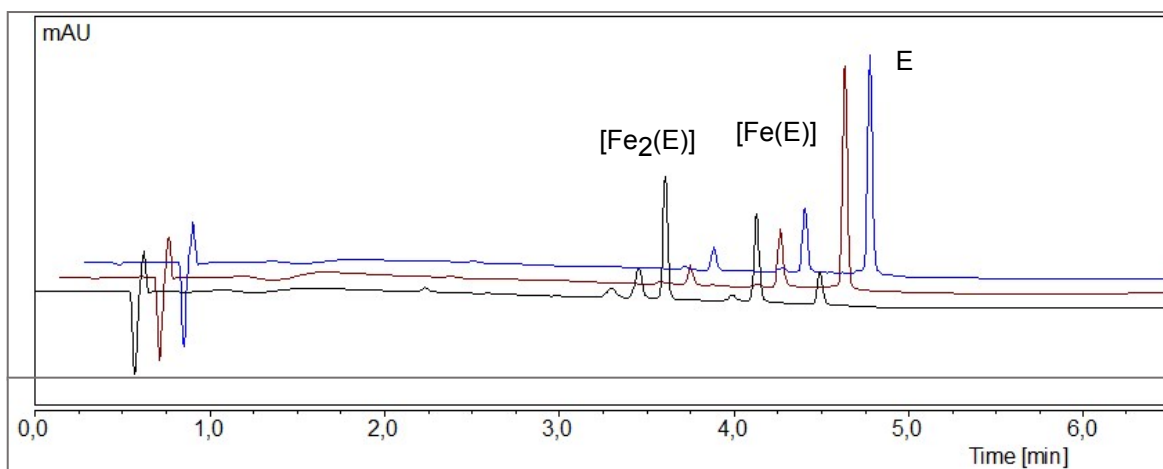

**Fig. S5** UHPLC chromatograms of complex **E** incubated with  $\text{FeCl}_3$  (1 equiv.) over 24 h at RT. Chromatograms show time points after 1 h, 2 h and 24 h (from back to front). Formation of new species (*i.e.*, adducts with one or two coordinated  $\text{Fe}^{3+}$ ) and decrease of the peak at 4.49 min, corresponding to parent complex **E**, can be observed over time.

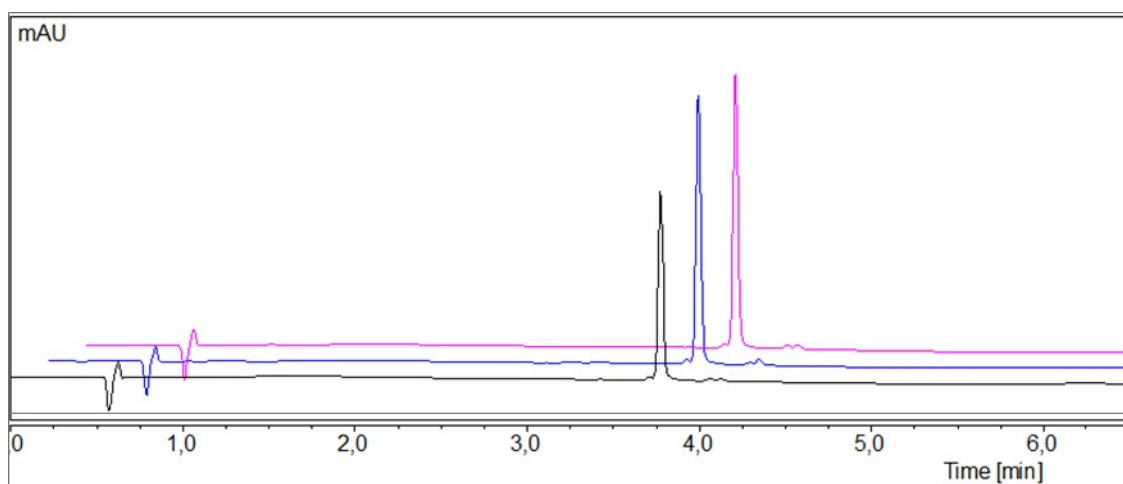

**Fig. S6** UHPLC chromatograms of complex **D** incubated with  $\text{ZnCl}_2$  (1 equiv.) over 24 h at RT. Chromatograms show time points after 1 h, 2 h and 24 h (from back to front). No formation of new adducts could be observed in this case. The small decrease in absorption intensity for the parent compound peak ( $t_R = 3.77$  min) can be attributed to precipitation from solution.

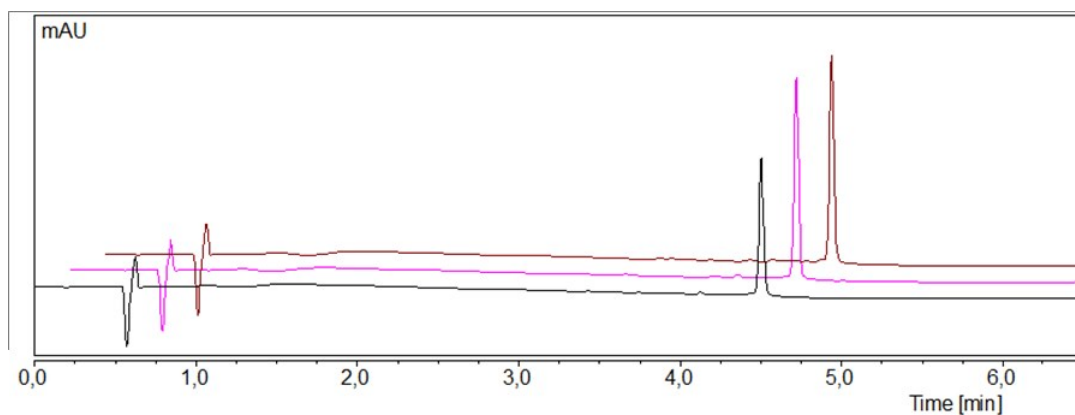

**Fig. S7** UHPLC chromatograms of complex **E** incubated with  $\text{ZnCl}_2$  (1 equiv.) over 24 h at RT. Chromatograms show time points after 1 h, 2 h and 24 h (from back to front). No formation of new adducts could be observed in this case. The small decrease in absorption intensity for the parent compound peak ( $t_R = 4.49$  min) can be attributed to precipitation from solution.

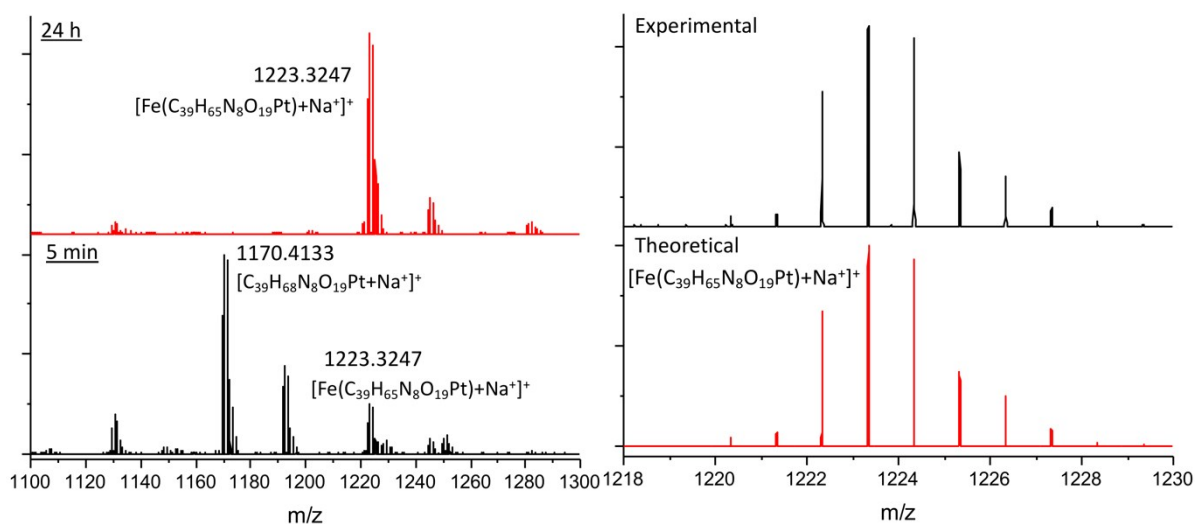

**Fig. S8** ESI-HRMS (+) spectra of complex **D** incubated with  $\text{FeCl}_3$  for 5 min and 24 h at RT. Experimental spectrum vs. simulated isotopic pattern for the Fe(III)-loaded species is shown on the right side.

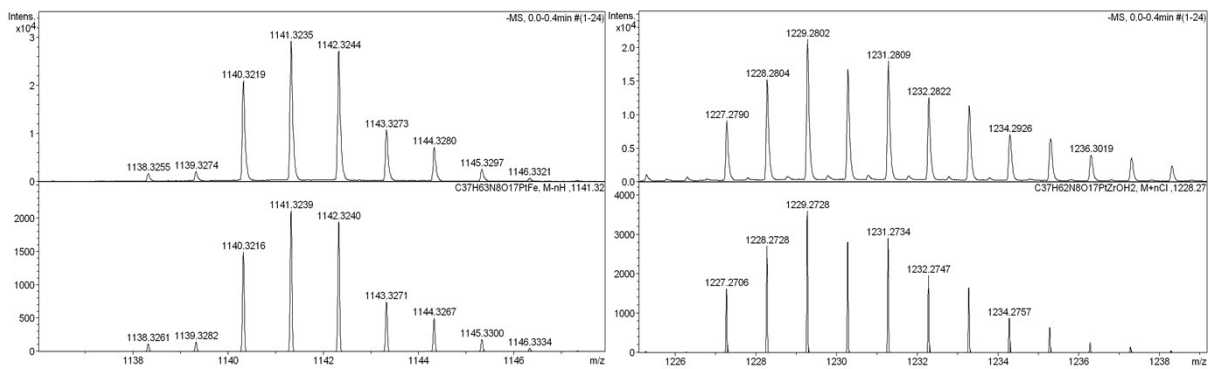

**Fig. S9** Selected peaks corresponding to Fe(III) and Zr(IV) adducts found in the ESI-HRMS (-) spectra of complex **B** after 2 h of incubation with FeCl<sub>3</sub> or ZrCl<sub>4</sub>, respectively. Experimental spectrum vs. simulated isotopic patterns for [Fe(C<sub>37</sub>H<sub>63</sub>N<sub>8</sub>O<sub>17</sub>Pt)-H<sup>+</sup>] (left) and [Zr(C<sub>37</sub>H<sub>63</sub>N<sub>8</sub>O<sub>17</sub>Pt)(OH)+Cl<sup>-</sup>] (right) are shown.

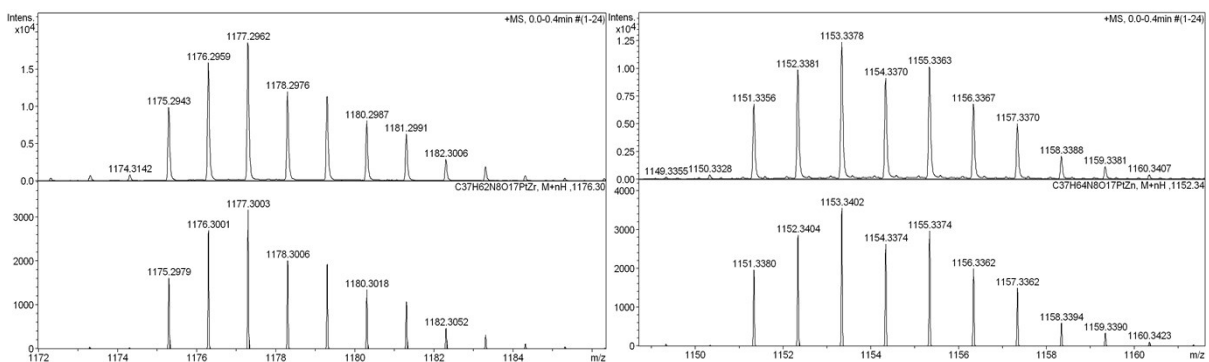

**Fig. S10** Selected peaks corresponding to Zr(IV) and Zn(II) adducts of complex **B** observed in the ESI-HRMS (+) spectra of complex **B** after 2 h of incubation with ZrCl<sub>4</sub> or ZnCl<sub>2</sub>, respectively. Experimental spectrum vs. simulated isotopic patterns for [Zr(C<sub>37</sub>H<sub>63</sub>N<sub>8</sub>O<sub>17</sub>Pt)]<sup>+</sup> (left) and [Zn(C<sub>37</sub>H<sub>64</sub>N<sub>8</sub>O<sub>17</sub>Pt)+H<sup>+</sup>]<sup>+</sup> (right) are shown.



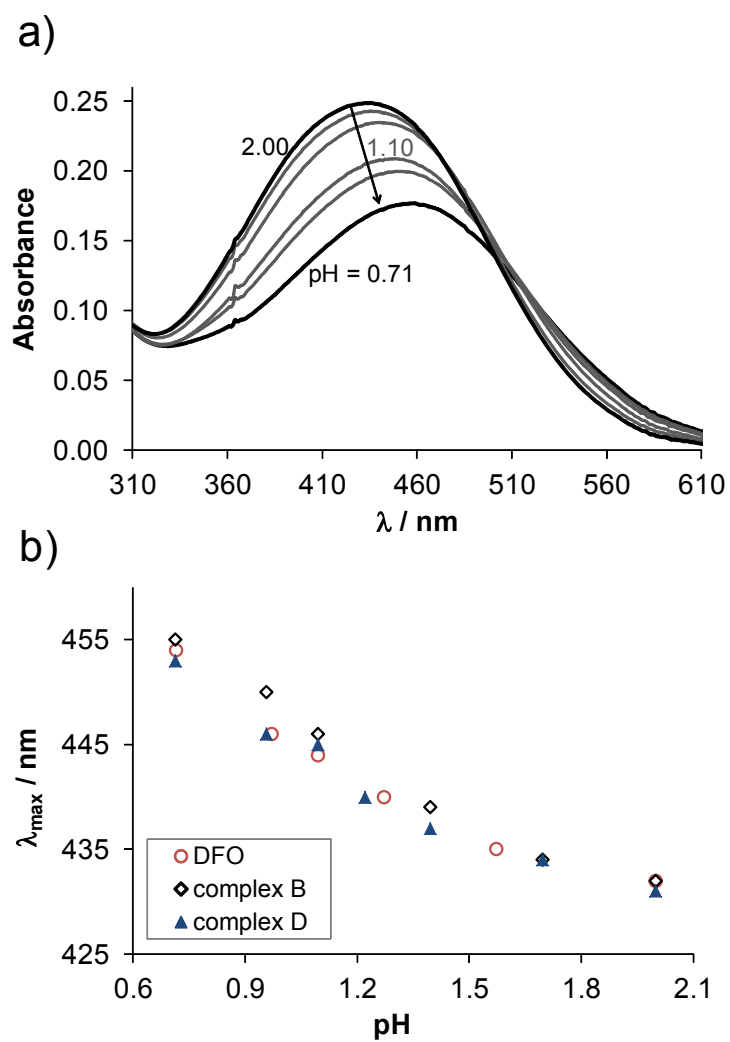

**Fig. S11** a) UV-visible spectra recorded for the Fe(III) – complex **B** (1:1) system in the pH range 0.7 – 2.0. b) Changes of  $\lambda_{\text{max}}$  values in dependence of pH in the Fe(III) – complex **B** / **D** / DFO (1:1) systems.

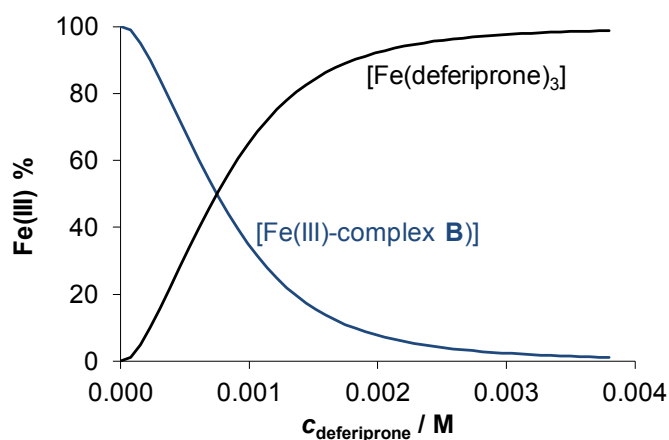

**Fig. S12** Concentration distribution curves computed for the Fe(III) – complex **B** – deferiprone (1:1:x) system at pH 7.4 ( $x = 0 - 72.2$ ). ( $c_{\text{Fe(III)}} = c_{\text{B}} = 50 \mu\text{M}$ ,  $c_{\text{deferiprone}} = 0 - 3.61 \text{ mM}$ ,  $T = 25^\circ\text{C}$ , ionic strength = 0.20 M KCl, path length = 1 cm)

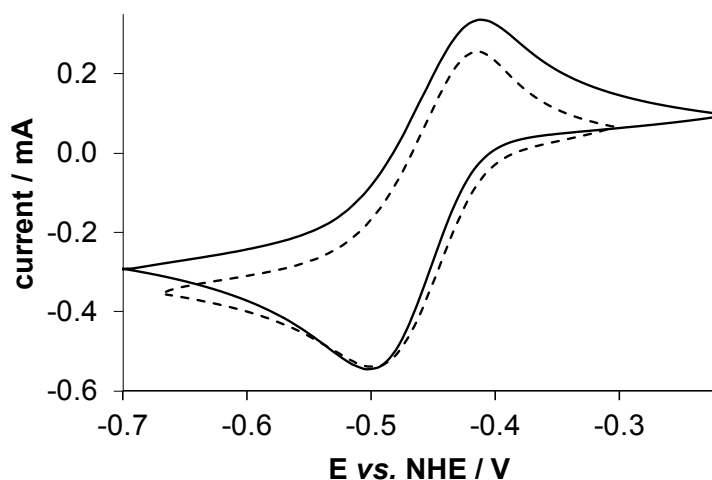

**Fig. S13** Cyclic voltammograms recorded for the Fe(III) – complex **B** (solid line) and Fe(III) – complex **D** (dashed line) systems at pH 7.4. ( $c_{\text{Fe(III)}} = c_{\text{B or D}} = 0.5 \text{ mM}$ ;  $I = 0.2 \text{ M KNO}_3$ ,  $T = 25^\circ\text{C}$ , using Pt working and counter electrodes and Ag/AgCl/3M KCl reference electrode)

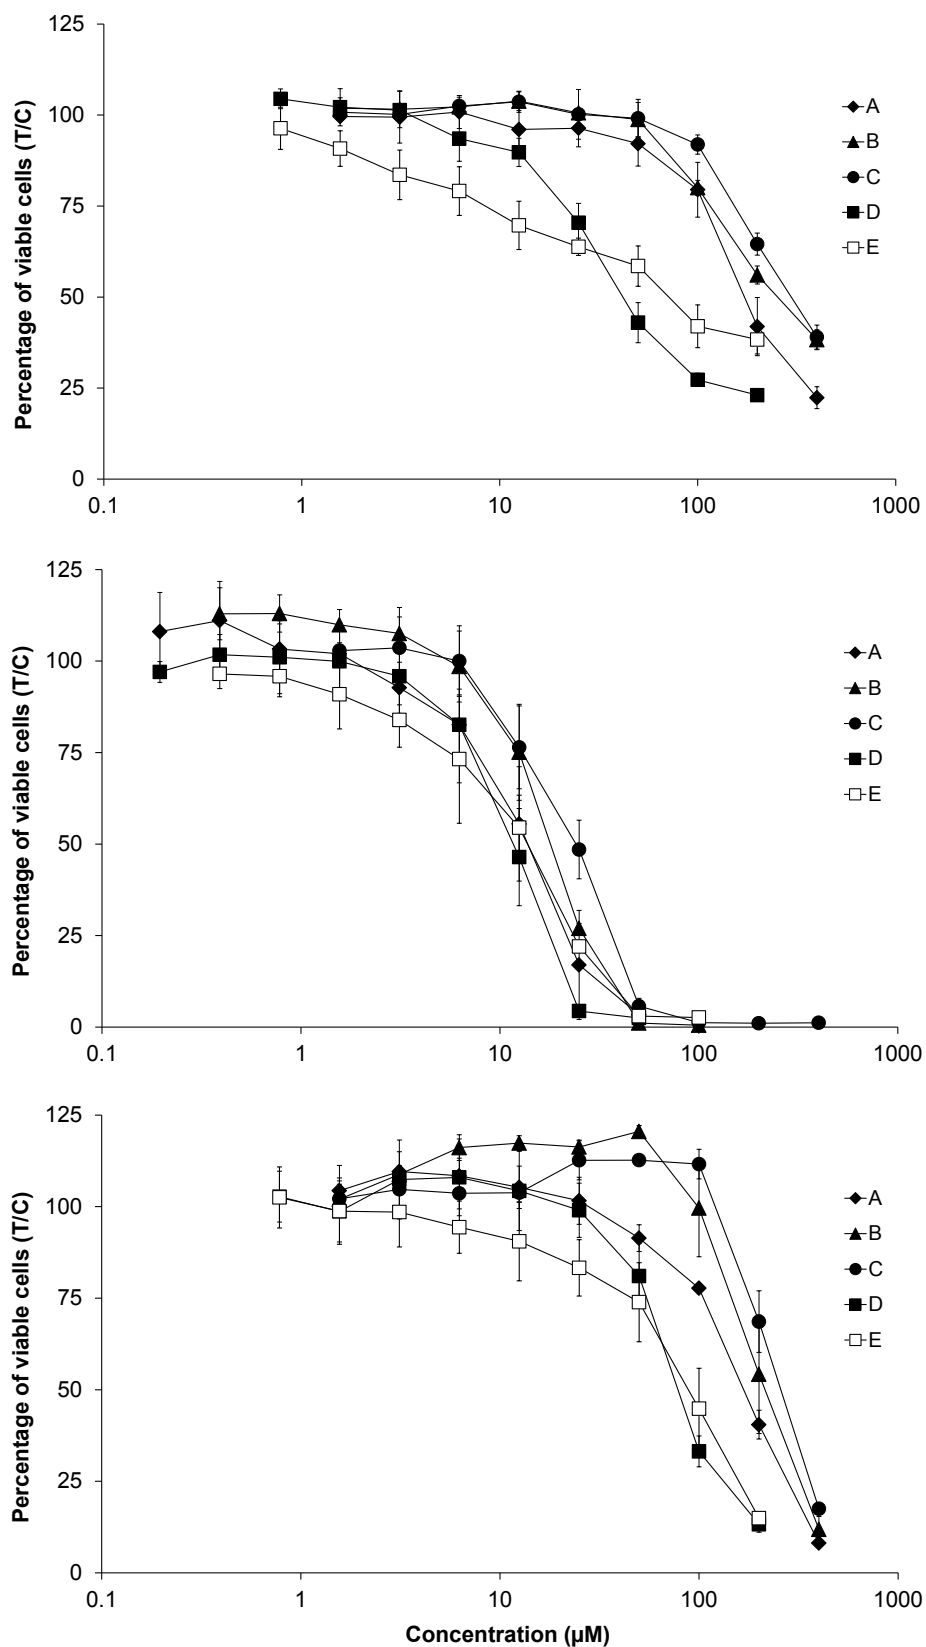

**Fig. S14** Concentration-effect curves of compounds **A–E** in the cancer cell lines A549 (top), CH1/PA-1 (middle) and SW480 (bottom). Values are means  $\pm$  standard deviations from at least three independent MTT assays (exposure time: 96 h).

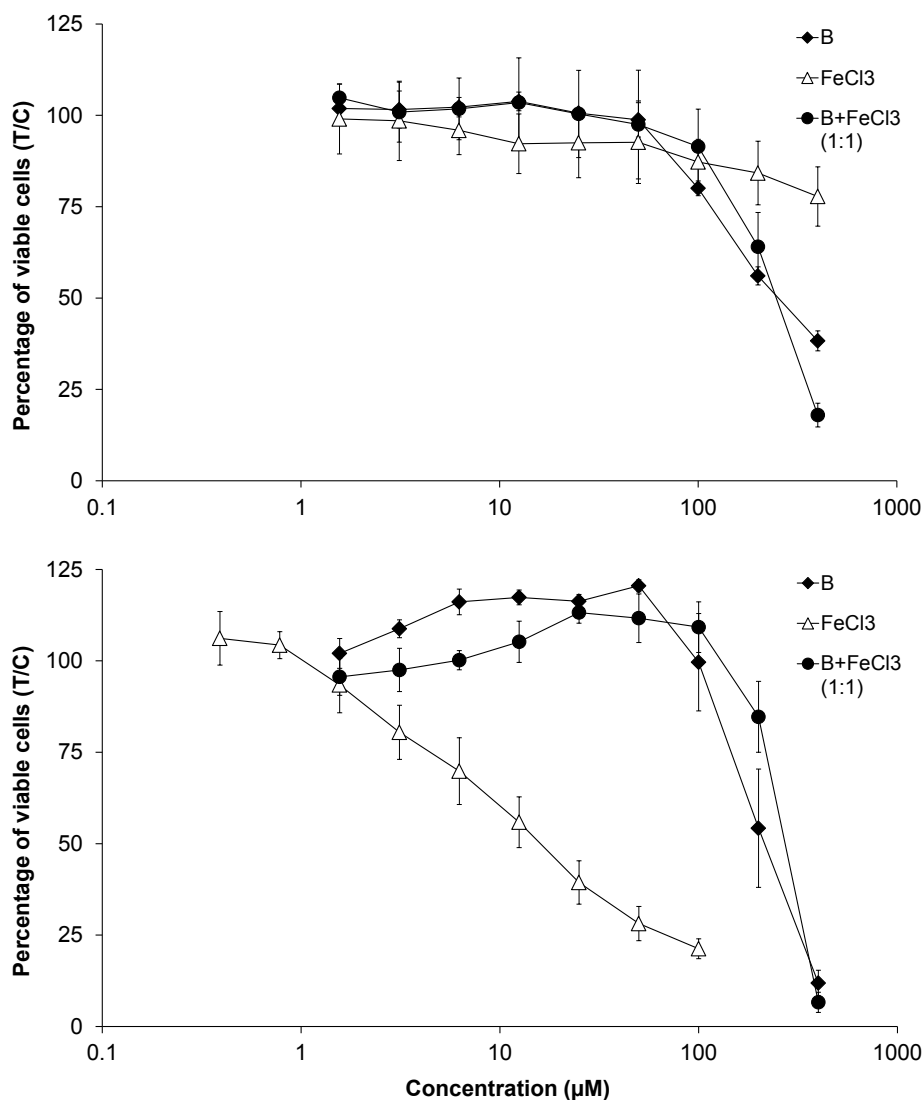

**Fig. S15** Concentration-effect curves of compound **B**, FeCl<sub>3</sub> and their equimolar combination in the cancer cell lines A549 (top) and SW480 (bottom). Values are means  $\pm$  standard deviations from at least three independent MTT assays (exposure time: 96 h). FeCl<sub>3</sub> on its own showed strong effect on the viability of SW480 cells ( $IC_{50}$  = 16  $\mu$ M), but not A549 cells ( $IC_{50}$  > 400  $\mu$ M); its cytotoxicity in SW480 cells is completely abolished upon co-incubation with complex **B**, possibly as a consequence of Fe(III) chelation. Whether the conspicuous insensitivity of A549 cells to FeCl<sub>3</sub> is connected to their expression of ABC-transporters other than P-gp or to other mechanisms remains unclear, however.

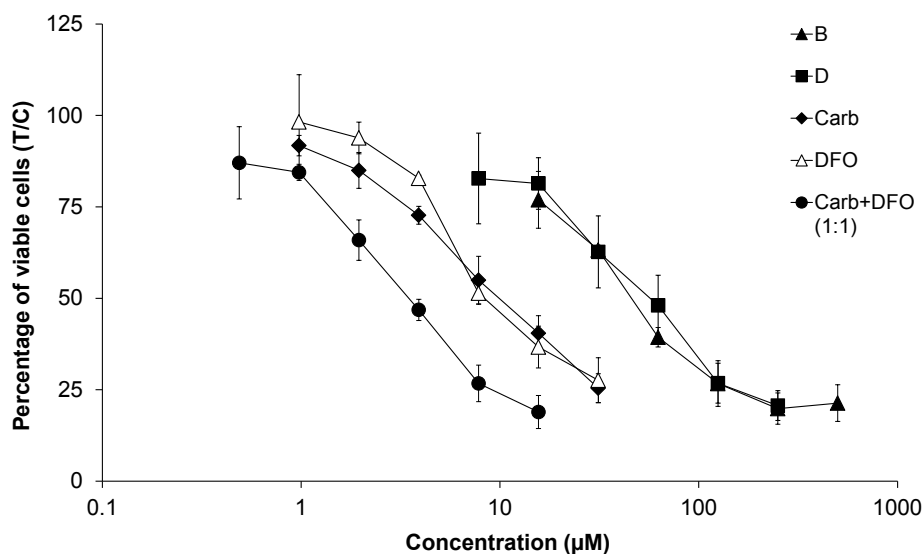

**Fig. S16** Concentration-effect curves of compounds **B** and **D**, carboplatin (Carb), DFO and the equimolar combination of the latter two in multicellular tumor spheroids of the cell line CH1/PA-1. Values are means  $\pm$  standard deviations from at least three independent resazurin assays (exposure time: 96 h).

**Table S2.** CI values for the combination between carboplatin and DFO in the investigated tumor cell models

| Cell Line        | Comb. ratio<br>(carbopt : DFO) | CI values <sup>a</sup> at effect level of |                          | CI <sub>wt</sub><br>values <sup>b</sup> | Symbol <sup>c</sup> |
|------------------|--------------------------------|-------------------------------------------|--------------------------|-----------------------------------------|---------------------|
|                  |                                | 75%                                       | 90%                      |                                         |                     |
| CH1              | 1 : 2                          | 0.823<br>(0.822 ± 0.057)                  | 0.750<br>(0.750 ± 0.069) | 0.766                                   | ++                  |
|                  | 1 : 1                          | 1.009<br>(1.005 ± 0.094)                  | 0.915<br>(0.912 ± 0.113) | 0.954                                   | ±                   |
| CH1<br>spheroids | 1 : 1                          | 0.713<br>(0.714 ± 0.078)                  | 0.801<br>(0.805 ± 0.151) | 0.800                                   | ++                  |
| SW480            | 1 : 2                          | 1.330<br>(1.329 ± 0.105)                  | 1.118<br>(1.202 ± 0.134) | 1.220                                   | --                  |
|                  | 1 : 1                          | 1.527<br>(1.517 ± 0.131)                  | 1.372<br>(1.371 ± 0.182) | 1.400                                   | --                  |
| A549             | 1 : 2                          | 0.731<br>(0.733 ± 0.121)                  | 0.675<br>(0.679 ± 0.215) | 0.704                                   | ++                  |
|                  | 1 : 1                          | 0.715<br>(0.717 ± 0.109)                  | 0.552<br>(0.554 ± 0.146) | 0.610                                   | +++                 |
|                  | 1 : 0.16 <sup>d</sup>          | 0.648<br>(0.653 ± 0.173)                  | 0.533<br>(0.546 ± 0.232) | 0.559                                   | +++                 |

<sup>a</sup> CI values were calculated using CompuSyn; the values in brackets represent the means ± 95% confidence intervals, as determined from the sequential deletion analysis (S.D.A.) as a measure of the CI variability at the presented effect levels (*i.e.*, at IC<sub>75</sub> and IC<sub>90</sub>).

<sup>b</sup> Weighted average CI values, calculated as follow:  $CI_{wt} = (CI_{50} + 2CI_{75} + 3CI_{90} + 4CI_{95})/10$ .

<sup>c</sup> Degrees of synergism (+ signs) or antagonism (- signs) are based on the ranges of CI<sub>wt</sub> values as described in *Pharmacol. Rev.*, 2006, **58**, 621: (±) near additive effect, (+) slight synergism, (++) moderate synergism, (+++) synergism, (++++) strong synergism; antagonism is divided in the same way, except using “-“ signs.

<sup>d</sup> data taken from *PLoS One*, 2019, **14**, e0211268.

## NMR spectra

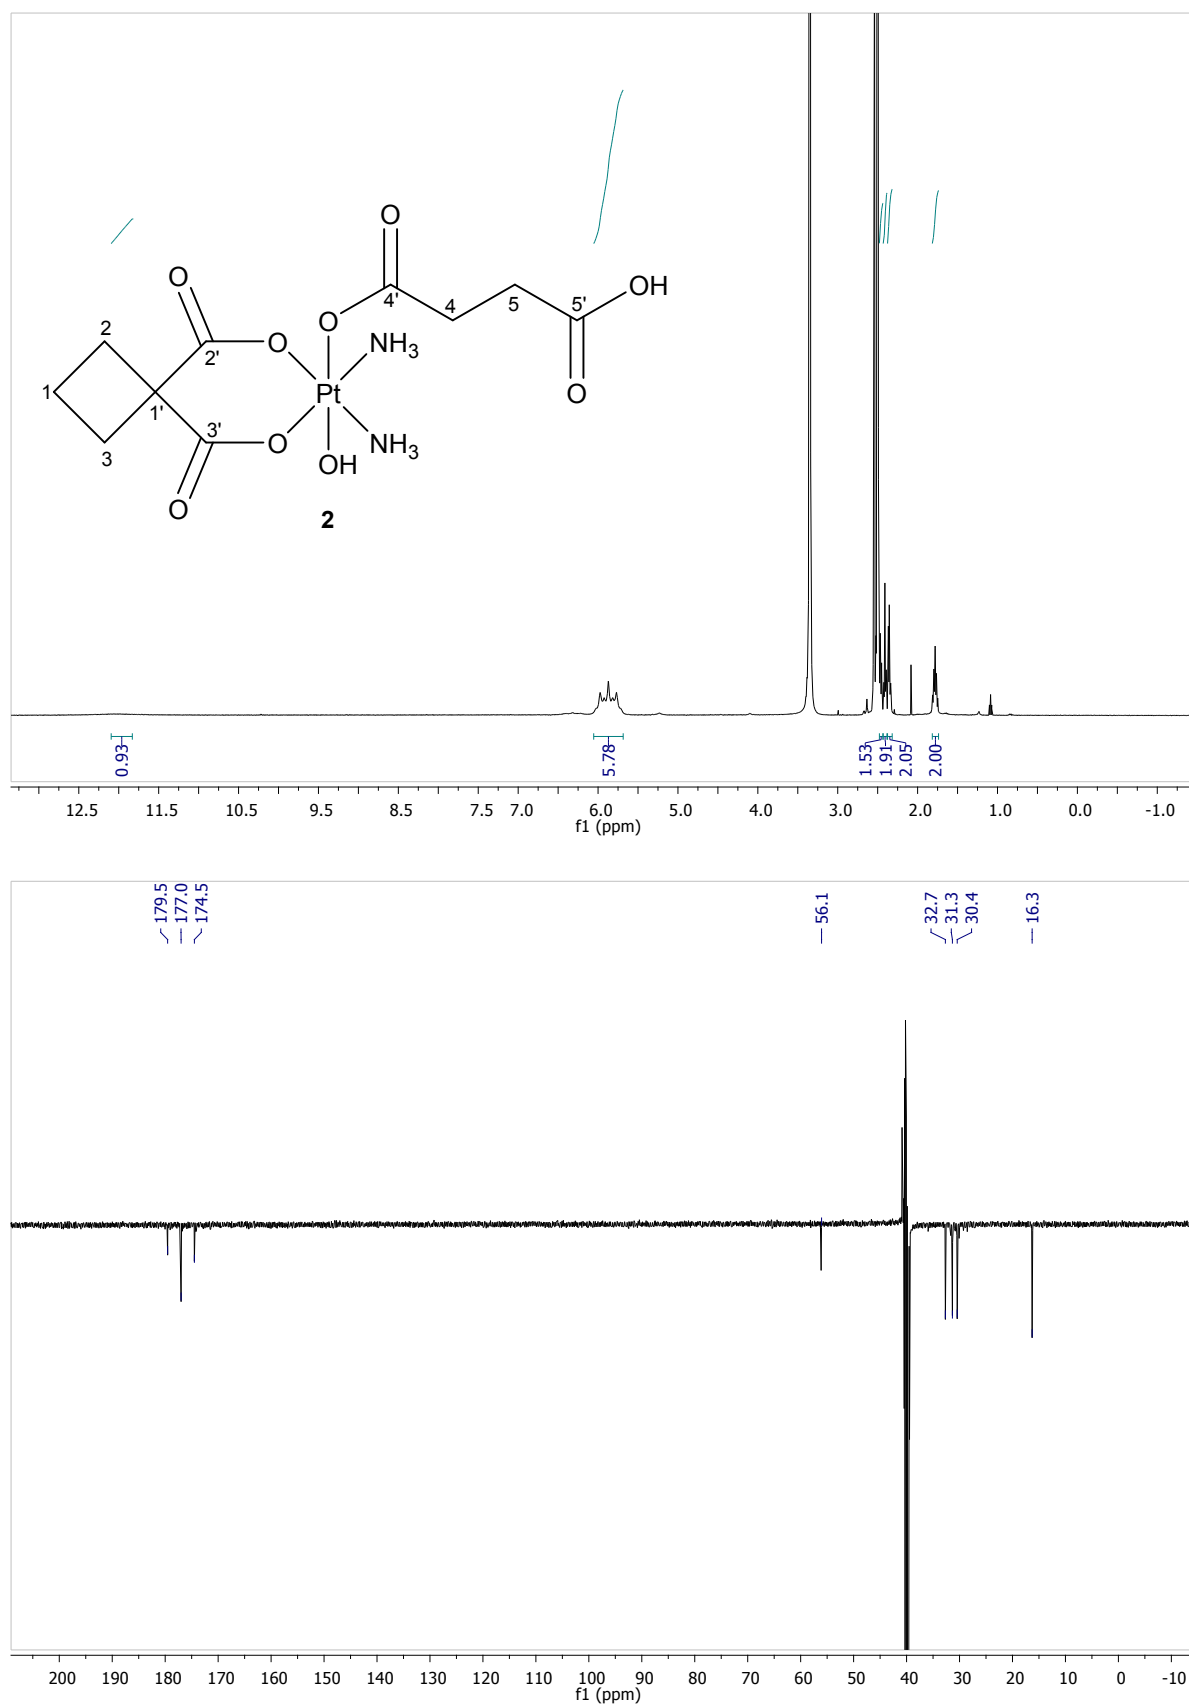

**Fig. S17** <sup>1</sup>H and <sup>13</sup>C NMR spectra of precursor **2** in DMSO-d<sub>6</sub> at 25 °C.

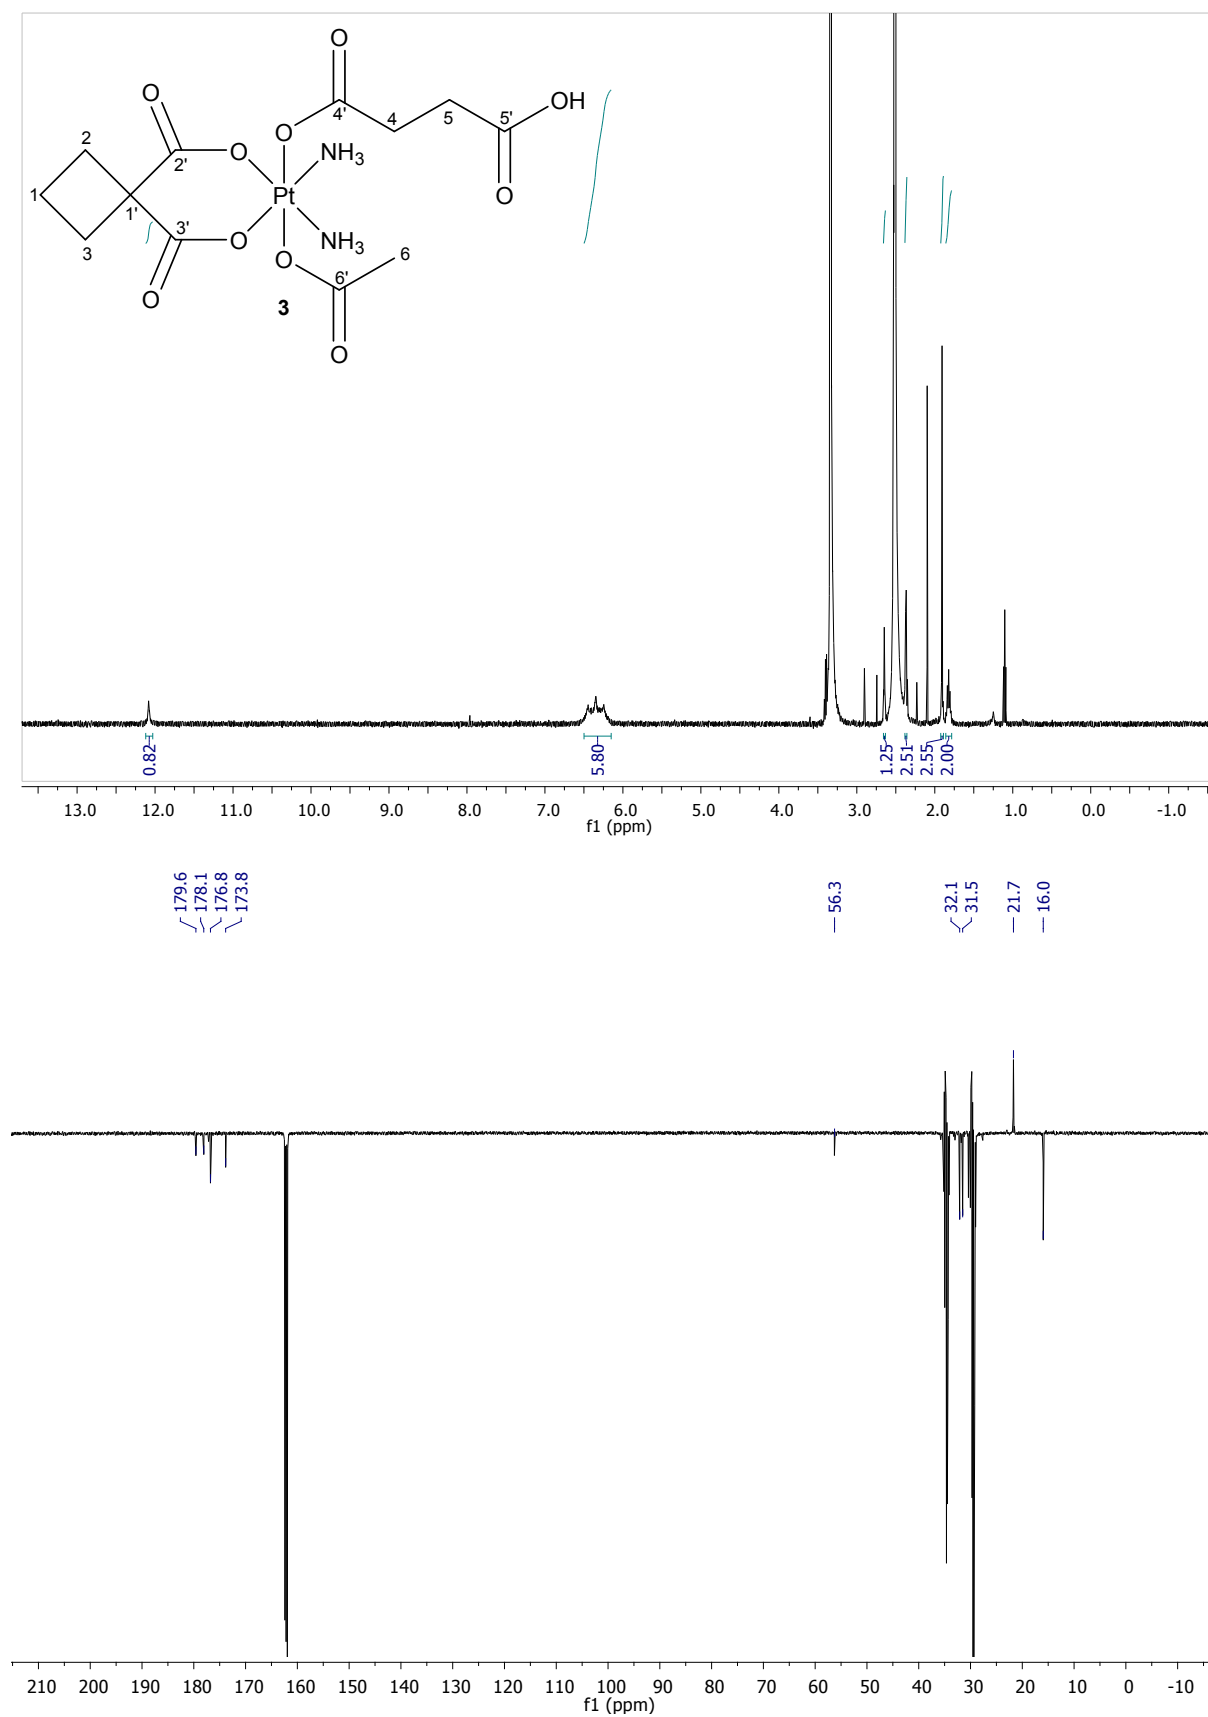

**Fig. S18** <sup>1</sup>H NMR (in DMSO-d<sub>6</sub>) and <sup>13</sup>C NMR (in DMF-d<sub>7</sub>) spectra of precursor **3** at 25 °C.



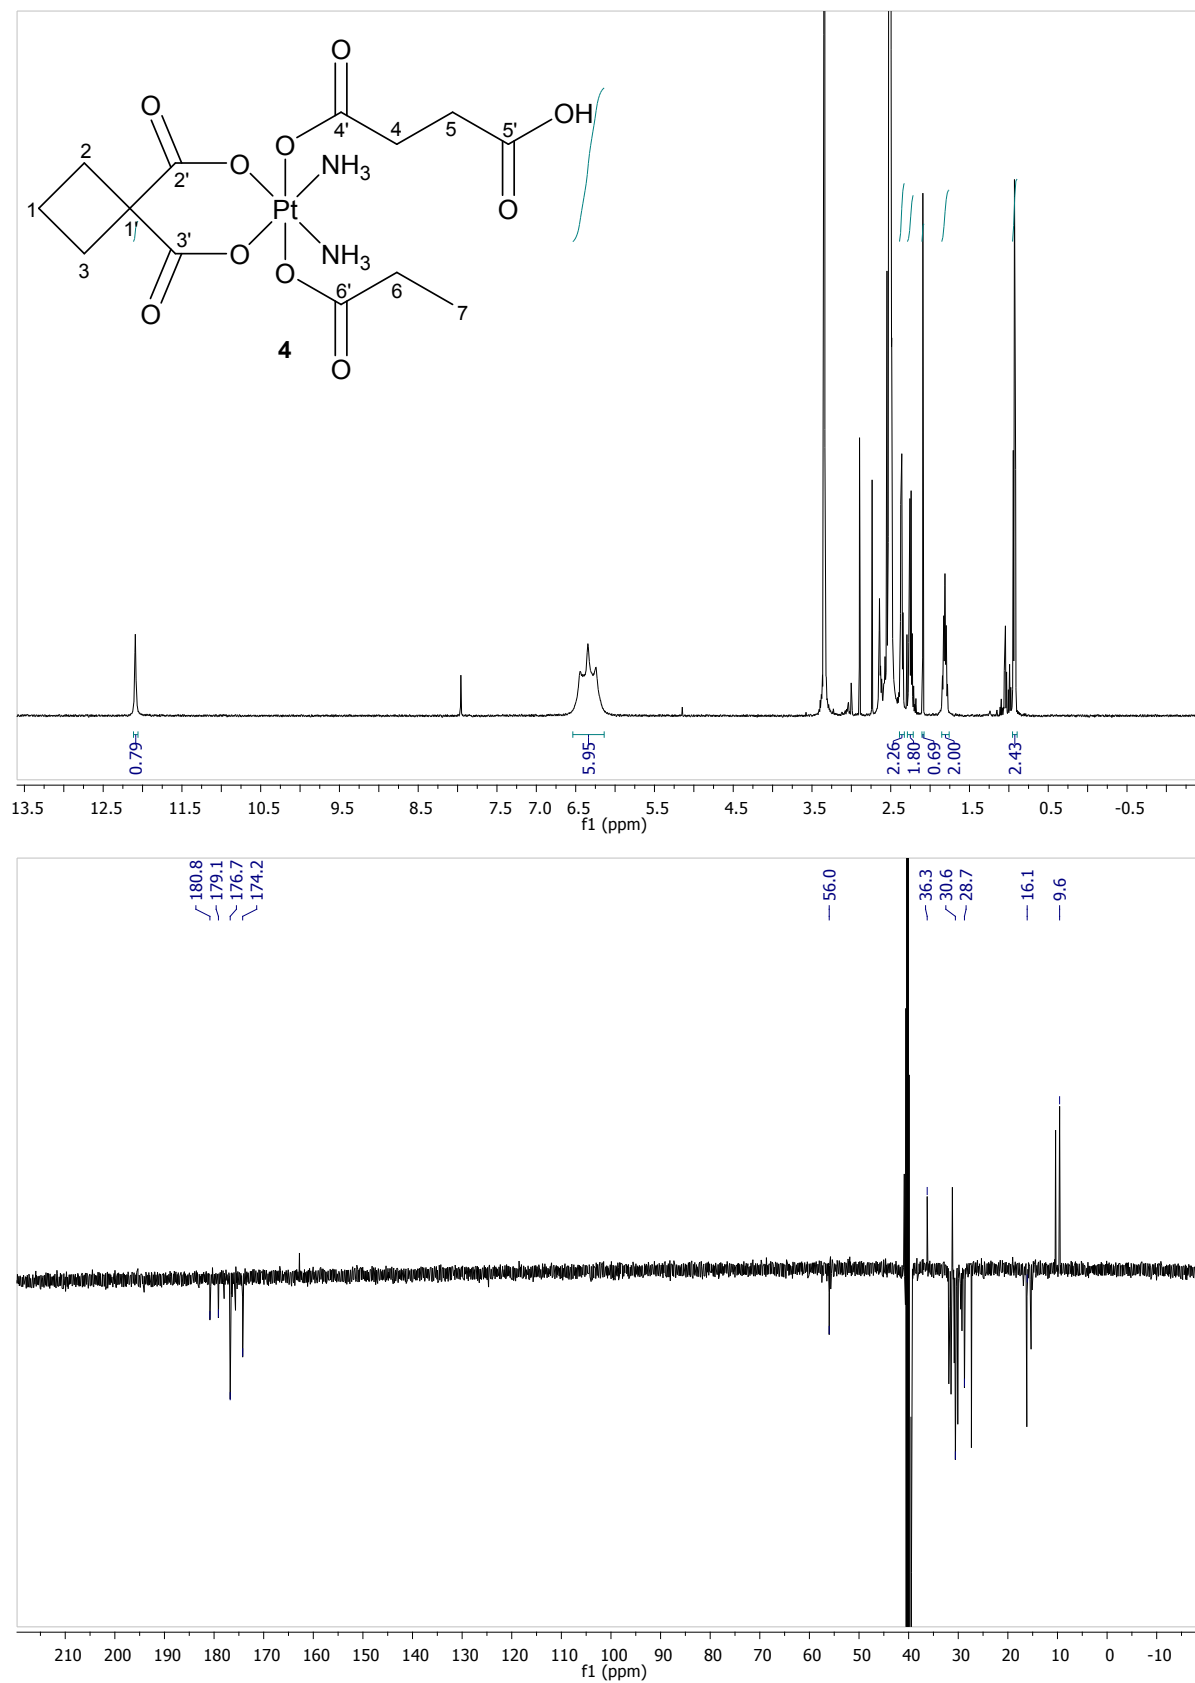

**Fig. S19**  $^1\text{H}$  and  $^{13}\text{C}$  NMR spectra of precursor **4** in  $\text{DMSO-d}_6$  at  $25^\circ\text{C}$ .

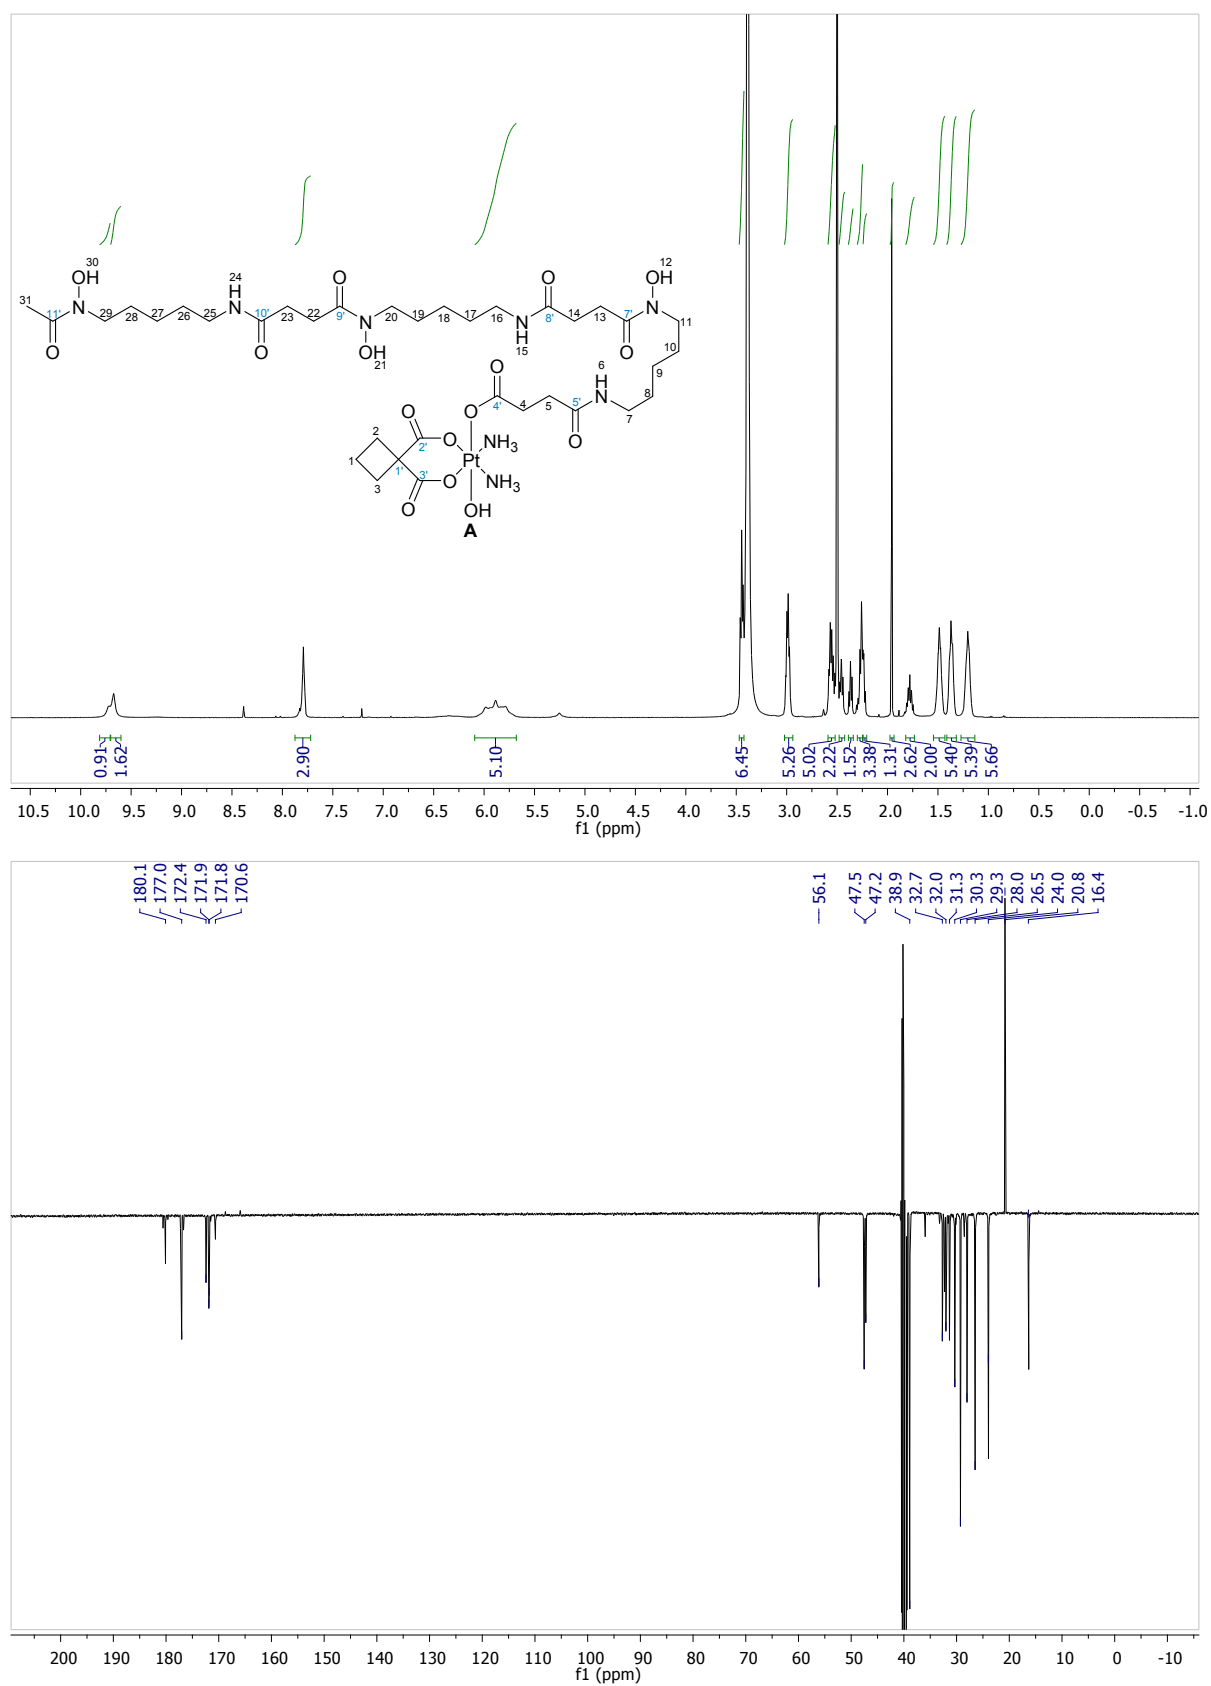

**Fig. S20** <sup>1</sup>H and <sup>13</sup>C NMR spectra of complex **A** in DMSO-d<sub>6</sub> at 25 °C.

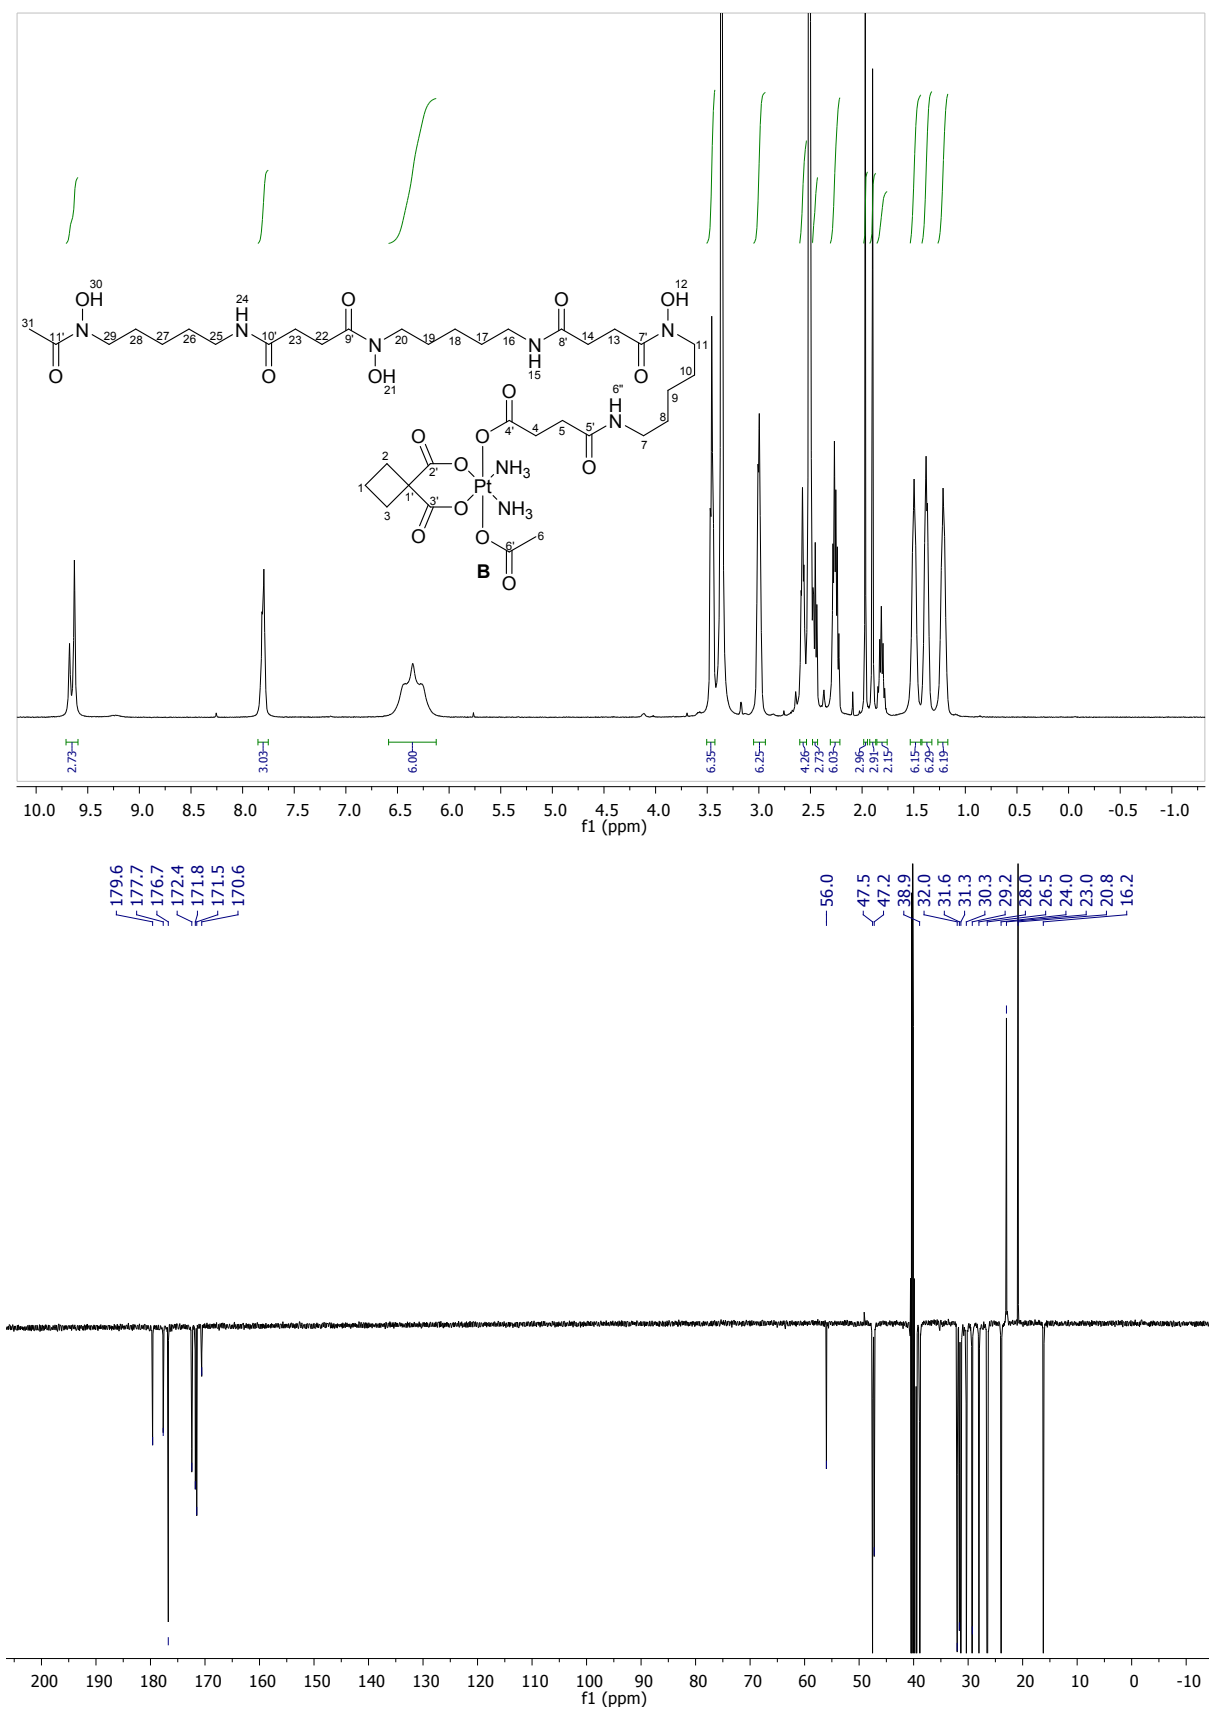

Fig. S21  $^1\text{H}$  and  $^{13}\text{C}$  NMR spectra of complex **B** in  $\text{DMSO-d}_6$  at  $25\text{ }^\circ\text{C}$ .

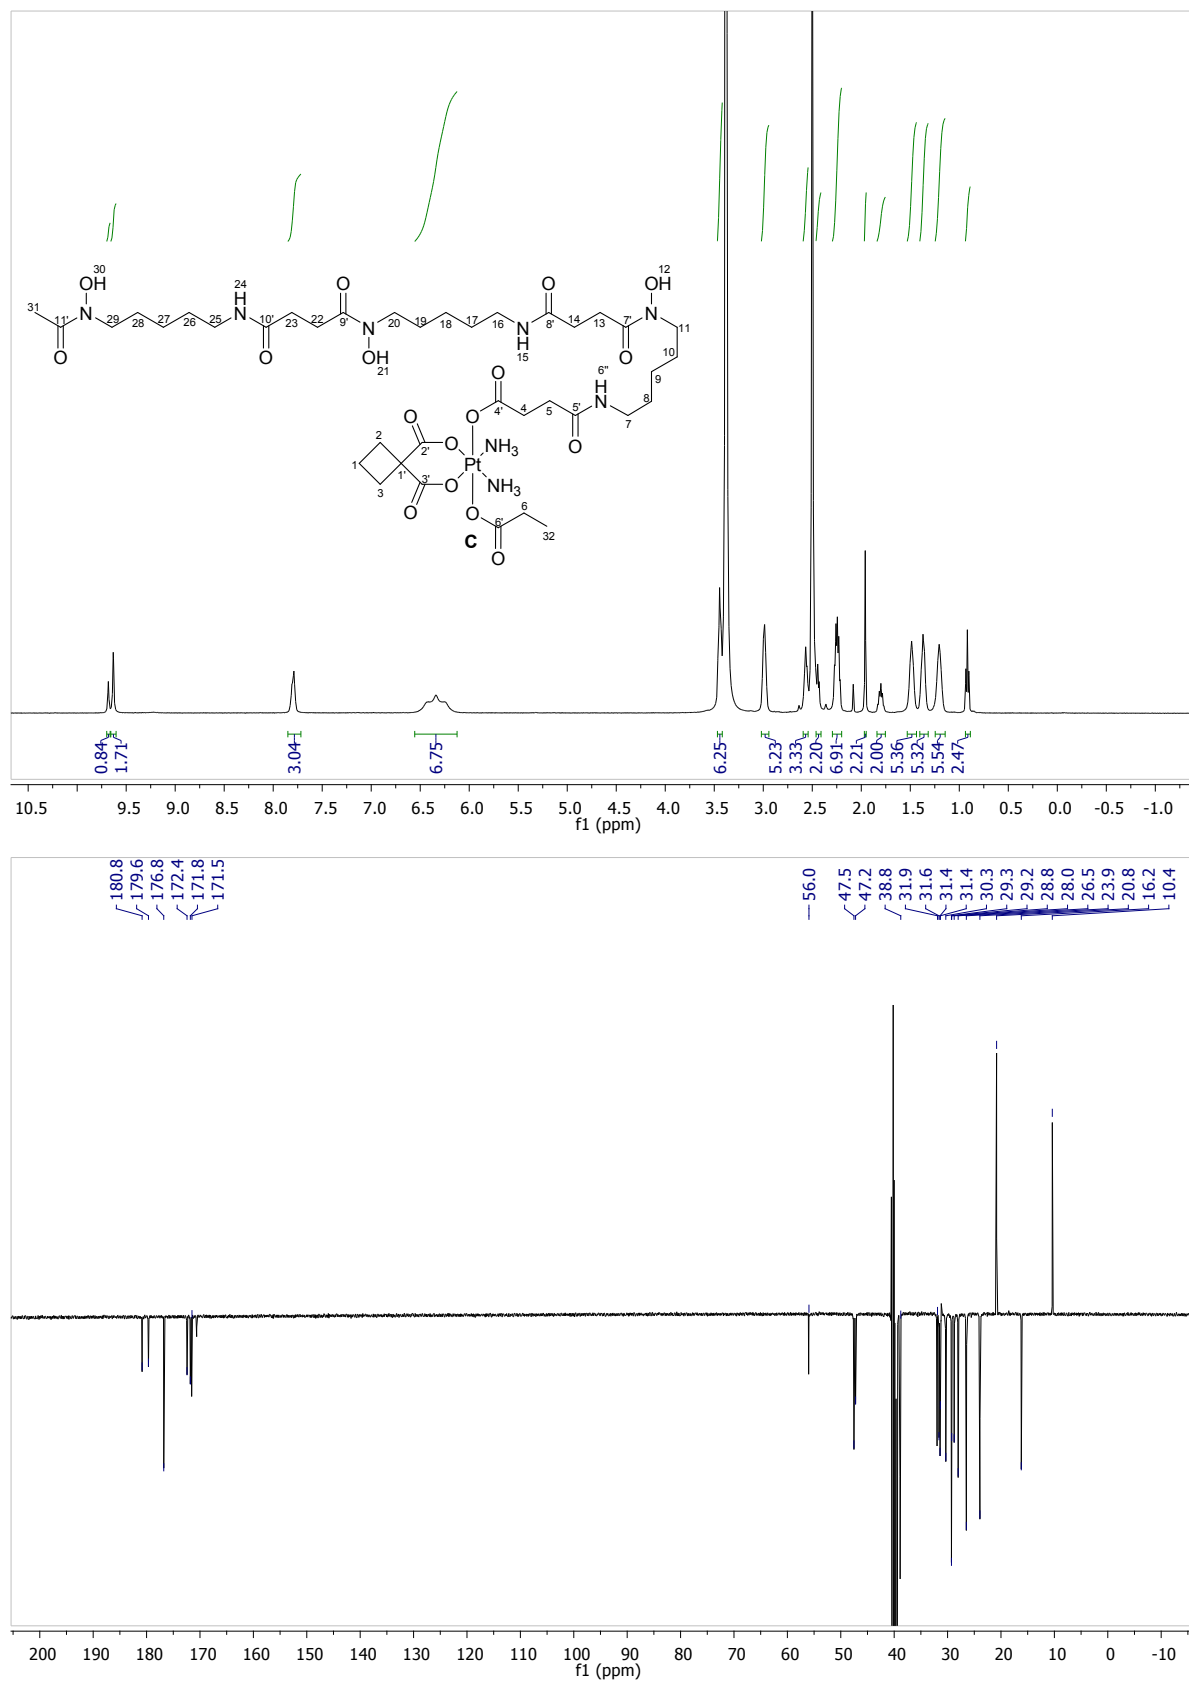

**Fig. S22**  $^1\text{H}$  and  $^{13}\text{C}$  NMR spectra of complex **C** in  $\text{DMSO-d}_6$  at  $25^\circ\text{C}$ .

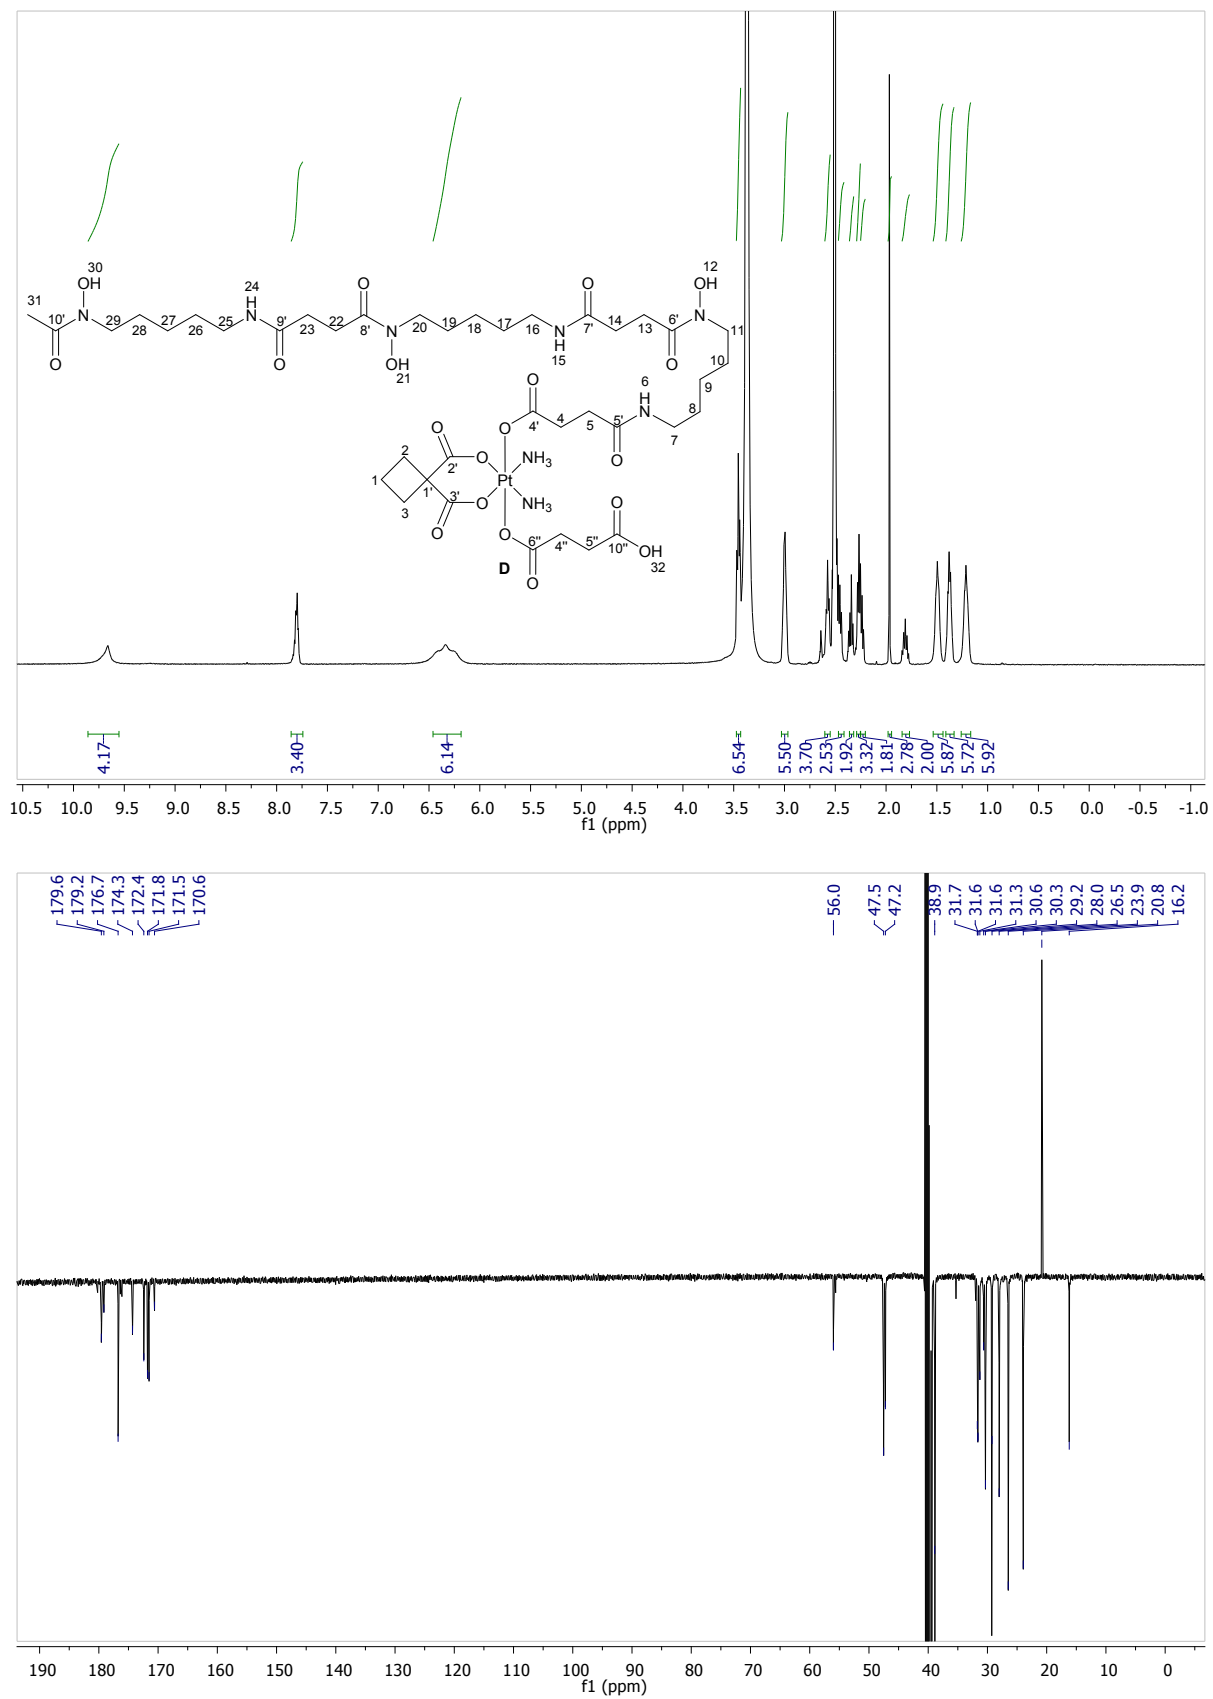

**Fig. S23**  $^1\text{H}$  and  $^{13}\text{C}$  NMR spectra of complex **D** in  $\text{DMSO-d}_6$  at  $25^\circ\text{C}$ .

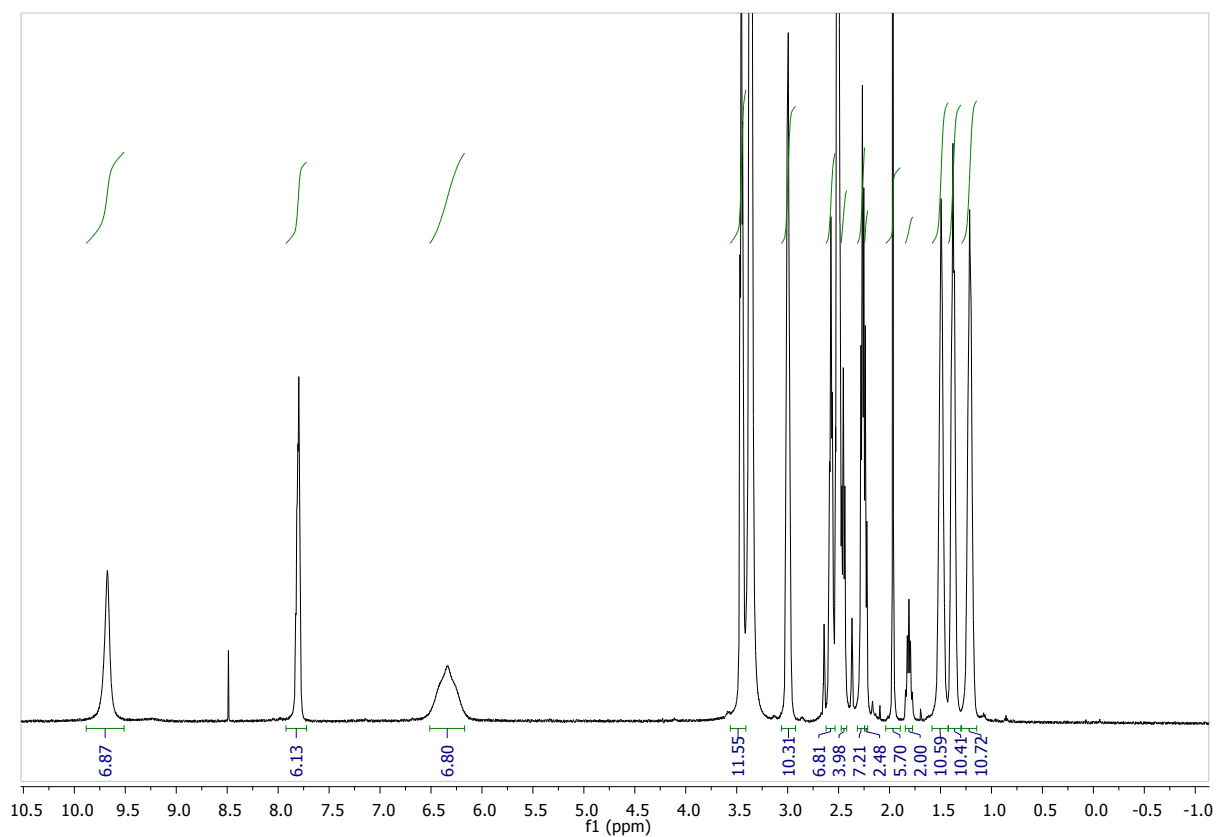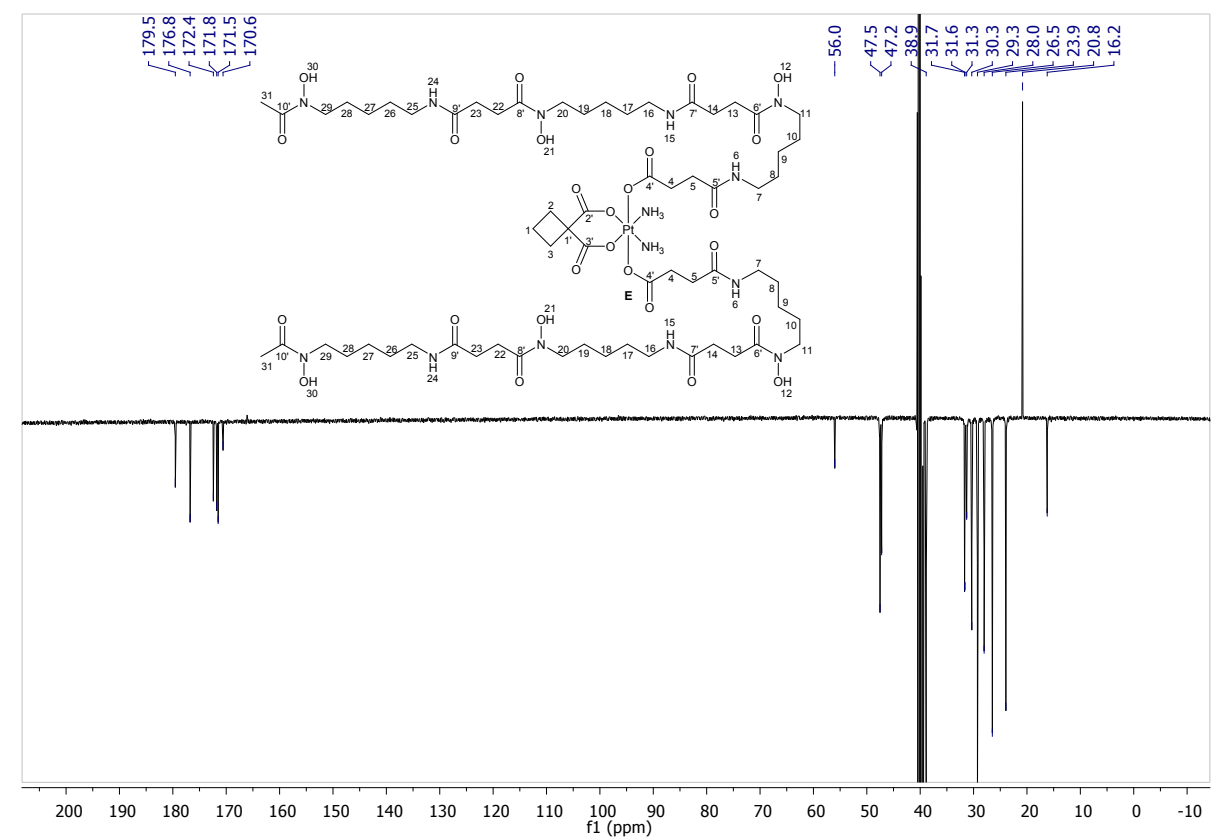

**Fig. S24**  $^1\text{H}$  and  $^{13}\text{C}$  NMR spectra of complex E in  $\text{DMSO-d}_6$  at  $25\text{ }^\circ\text{C}$ .
